# Supplementary material for: Physicochemical Characterizations, Digestibility, and Lipolysis Inhibitory Effects of Highland Barley Resistant Starches Prepared by Physical and Enzymatic Methods
Source: MDPI journal article supplement (doi:10.3390/molecules28031065), 2023-01-20
Supplement: s1 [file s1]

## Supplemental Materials

### Figure legends

**Figure S1.** The morphological property of HBS at the magnifications of  $500.0\times$  (A),  $2000.0\times$  (B), and  $5000.0\times$  (C).

**Figure S2.** FT-IR spectrum (A) and XRD pattern (B) of HBS.

A

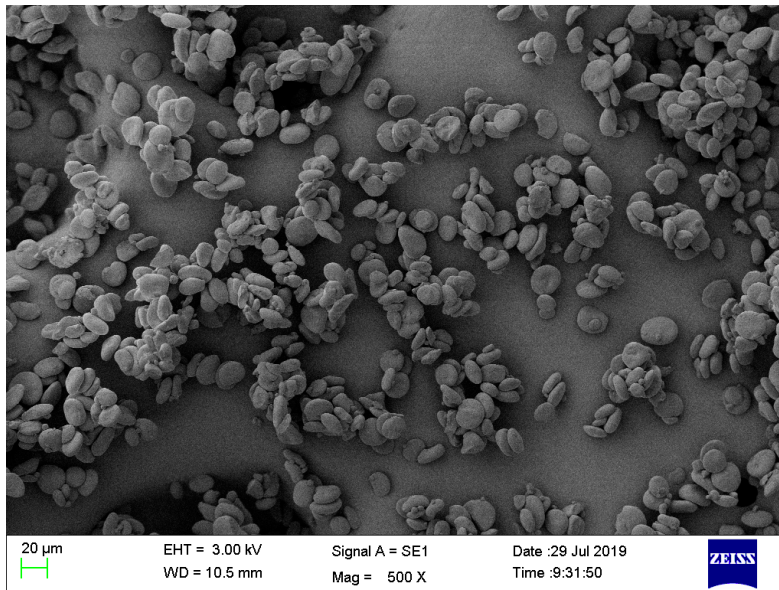

B

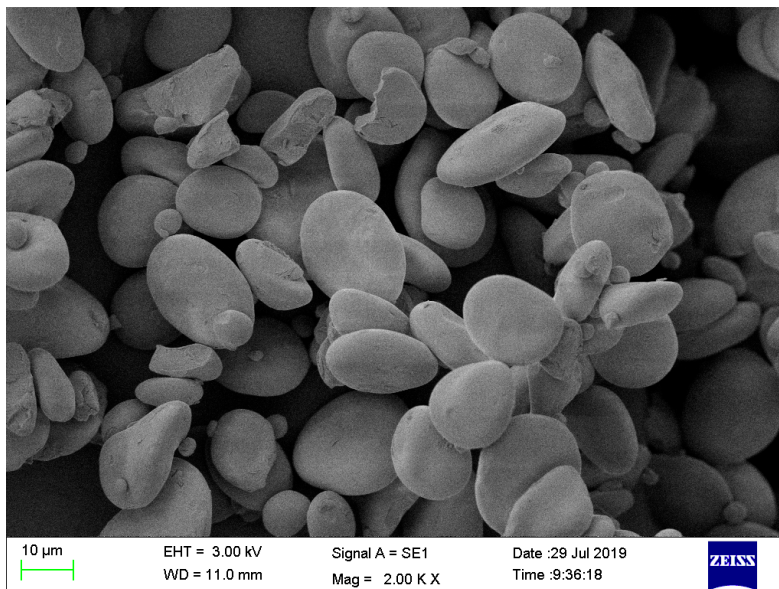

C

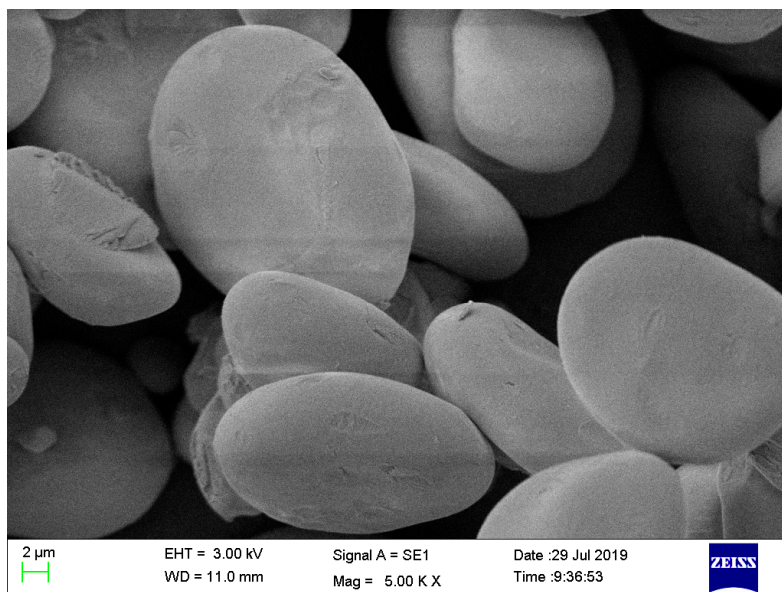

**Figure S1:** The morphological property of HBS at the magnifications of 500.0× (A), 2000.0× (B), and 5000.0× (C)

**A**

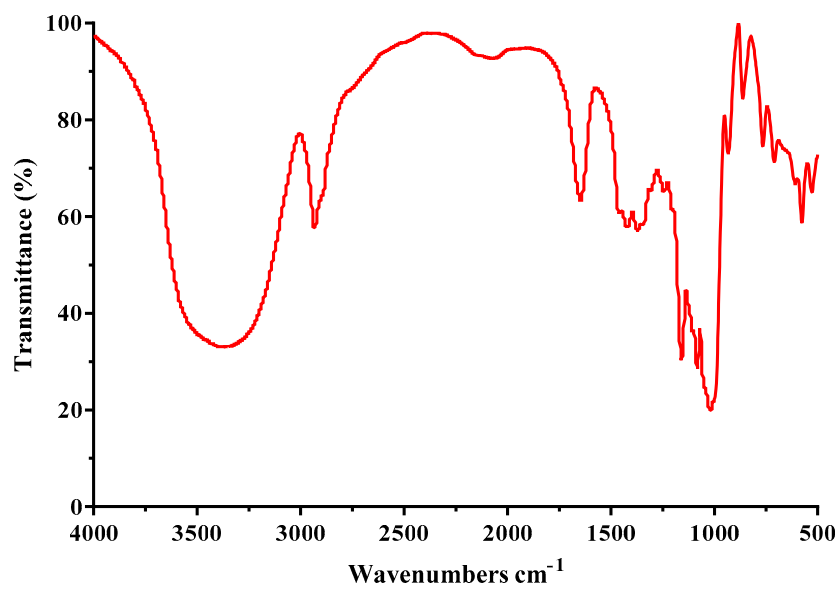

**B**

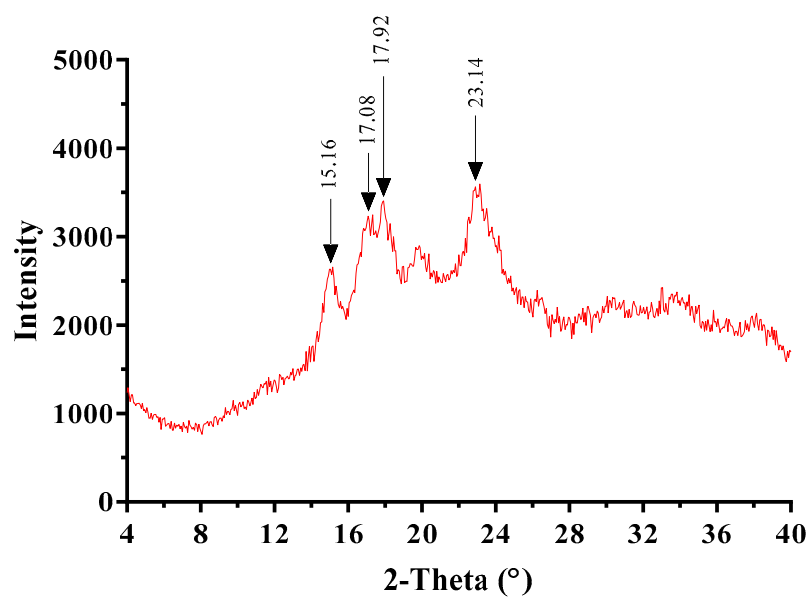

**Figure S2:** FT-IR spectrum (**A**) and XRD pattern (**B**) of HBS

## Tables

**Table S1** Physicochemical characterization of HBS.

| Samples                      | HBS             |
|------------------------------|-----------------|
| Total starch content (%)     | 96.82 ± 0.24    |
| Amylose content (%)          | 32.98 ± 0.82    |
| Protein content (%)          | nd <sup>b</sup> |
| Water-binding capacity (g/g) | 137.50 ± 2.12   |
| Solubility (%)               | 14.75 ± 2.47    |
| Swelling power (g/g)         | 11.57 ± 0.68    |
| Relative crystallinity (%)   | 18.03 ± 0.51    |

<sup>a</sup> % is expressed as the weight percent. <sup>b</sup> nd means no data detected.

The data were presented as means ± SD (n = 3).
